# Supplementary material for: Trifluoperazine and Its Analog Suppressed the Tumorigenicity of Non-Small Cell Lung Cancer Cell; Applicability of Antipsychotic Drugs to Lung Cancer Treatment
Source: MDPI journal article supplement (doi:10.3390/biomedicines10051046), 2022-04-30
Supplement: s1 [file s1]

Figure S1

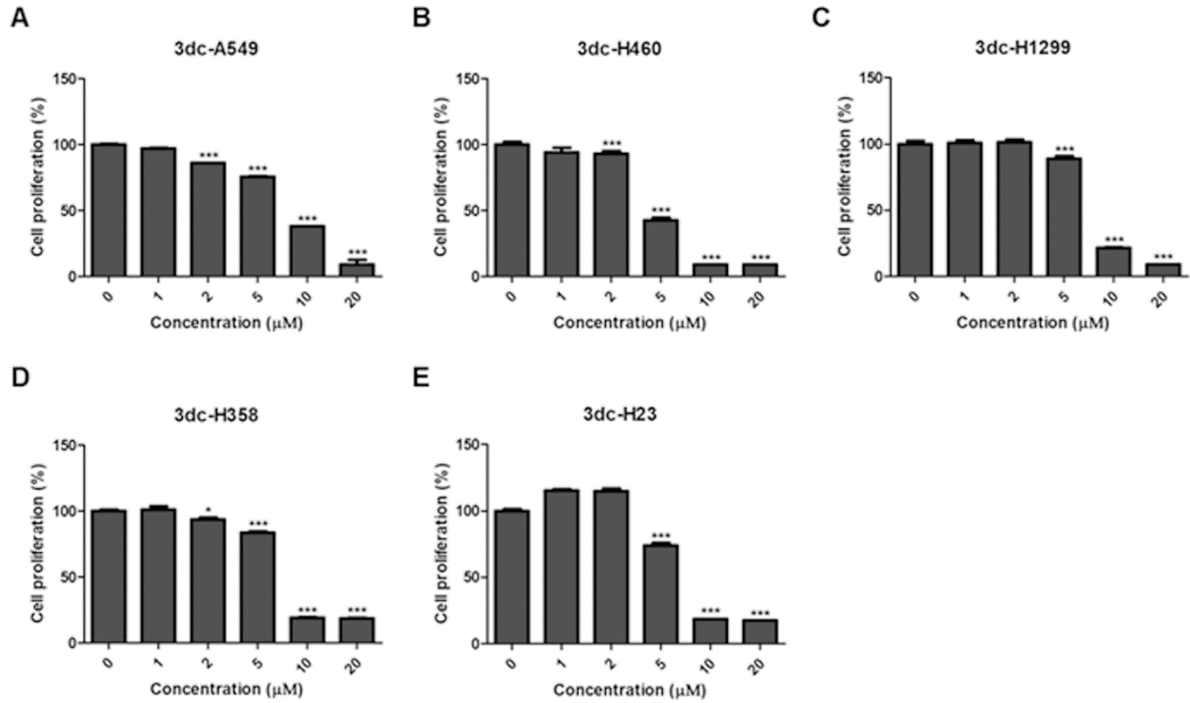

Effect of 3dc on NSCLC cell proliferation. NSCLC cells (A549, H460, H1299, H358, H23) were treated with 3dc at various concentrations (0-20  $\mu\text{M}$ ). Cell proliferation was assessed using MTT assay. Data shown as mean  $\pm$  S.E. \* $P < 0.05$ , \*\*\* $P < 0.001$  vs. CTL (0  $\mu\text{M}$  for each).
